# Supplementary material for: Impact on well-being and motivation to physical activity practice by ‘Moving Park’ project in Italy
Source: Springer Nature journal article supplement (doi:10.1007/s11332-025-01447-1), 2025-06-07
Supplement: MOESM1 [file 11332_2025_1447_MOESM1_ESM.docx]

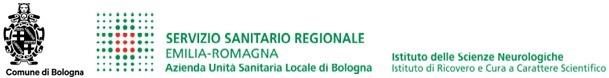


**PARCHI IN MOVIMENTO 2022**

**Questionario di rilevazione PRE–ATTIVITA’**

Gentile partecipante,

le chiediamo di compilare questa scheda che raccoglie alcune informazioni all’avvio del progetto Parchi in Movimento 2022. La informiamo che i dati personali forniti saranno utilizzati e trattati esclusivamente dal Comune di Bologna, dall’Azienda USL di Bologna e dall'Università di Bologna nel pieno rispetto della privacy secondo i sensi del decreto legislativo 30 giugno 2003, n. 196 “codice in materia di protezione dei dati personali” e dell’art. 13 del GDPR (regolamento EU 2016/679). Le risposte fornite verranno elaborate solo in forma aggregata e utilizzate per pubblicazioni scientifiche.

**CODICE:** __________________ (inserisca in stampatello maiuscolo l’iniziale del suo nome seguita dall’iniziale del suo cognome).

**Data odierna** (formato GG/MM/AAAA) ___________

**Associazione**_______________________________________________________________

**Attività**

1. **- Sesso**  M  F  Altro

1. **– Data di nascita (GG/MM/AAAA)** **___________**

1. **– Qual è il suo titolo di studio?**

Nessun titolo

Diploma scuola elementare

Diploma di scuola secondaria di 1° grado (terza media)

Diploma di scuola secondaria di 2° grado (liceo o istituto tecnico/professionale)

Laurea e/o Dottorato e/o Master

1. **– È fumatore / fumatrice?**  No  Sì

1. **- Soffre di patologie croniche?**  No  Sì

(es. diabete, ipertensione, osteoporosi, malattie del cuore, malattie neurodegenerative)

1. **- Com’è avvenuto a conoscenza dell’iniziativa**? (Barrare una sola risposta)

- - - Volantino/manifesto  Passeggiando nel parco  Passaparola  Newsletter

- - - Social media (es. facebook)  Internet Associazione

- - - Altro (specificare)_____________________________________________

1. **– Perché partecipa all’iniziativa di Parchi in Movimento? (barrare la motivazione principale, una sola riposta)**

- - - È gratuita

- - - I parchi dove vado sono comodi da raggiungere

- - - Mi sento bene quando partecipo

- - - Mi permette di stare all’aria aperta e nel verde
    - Per le persone che frequentano insieme a me

- - - Le attività proposte sono di mio gradimento

- - - Altro (specificare)______________________________________________

1. **– Ha precedentemente partecipato a Parchi in Movimento?**

 No  Sì

- 1. **– Se sì, in quali degli ultimi cinque anni? (scelta multipla: selezioni tuti gli anni di partecipazione)**

 2017  2018  2019  2020  2021

1. **– Durante il periodo invernale, quando l’attività dei parchi è sospesa, ha praticato attività fisica regolarmente?**

 Non svolgo attività fisica  Svolgo attività fisica

- 1. **– Se ha risposto “svolgo attività fisica”, quanto tempo a settimana svolge attività fisica moderata (l'attività fisica moderata è quella che permette, durante la sua esecuzione, di parlare ma non di cantare, ad es.: camminare velocemente, ballare, andare in bicicletta ecc.)?**

Meno di 1h  1h  2h  2,5h  più di 2,5h

- 1. **– Se ha risposto “svolgo attività fisica”, quanto tempo a settimana svolge attività fisica vigorosa (l’attività fisica vigorosa è quella che non permette, durante la sua esecuzione, né di parlare né di cantare, ad es.: corsa, nuoto, fitness ecc.)?**

meno di 30 minuti  30 minuti  1h 1h e 15  più di 1h e 15

*Ora le faremo qualche domanda sul suo* ***stato di salute e benessere*** *nelle ultime 4 settimane. Scelga la risposta che le sembra più appropriata (barrare una sola risposta)*

| **Nelle ultime 4 settimane,** | *MAI* | *QUASI MAI* | *UNA*  *PARTE DEL*  *TEMPO* | *MOLTO TEMPO* | *QUASI SEMPRE* | *SEMPRE* |
| --- | --- | --- | --- | --- | --- | --- |
| **10 – *È* stato infastidito da stati di tensione o perché aveva i nervi a fior di pelle?** |  |  |  |  |  |  |
| **11 - Quanto si è sentito pieno di energia o vitalità?** |  |  |  |  |  |  |
| **12 - Si è sentito scoraggiato e triste?** |  |  |  |  |  |  |
| **13 - Si è sentito emotivamente stabile e sicuro di sé stesso?** |  |  |  |  |  |  |
| **14 - Si è sentito allegro e sereno?** |  |  |  |  |  |  |
| **15 - Si è sentito stanco, esaurito, logorato o sfinito?** |  |  |  |  |  |  |

*Infine, siamo interessati a capire le ragioni per cui decide di praticare o non praticare esercizio fisico. Indicare quanto sono vere per lei le seguenti affermazioni, da 1 (per niente vero) a 5 (molto vero)*

|  | *1*  *(per niente vero)* | *2* | *3* | *4* | *5*  *(molto vero)* |
| --- | --- | --- | --- | --- | --- |
| **16 – Faccio esercizio fisico perché altre persone dicono che dovrei farlo** |  |  |  |  |  |
| **17 – Mi sento in colpa quando non faccio esercizio fisico** |  |  |  |  |  |
| ***18 – È importante per me fare esercizio fisico regolarmente*** |  |  |  |  |  |
| ***19 – Traggo piacere e soddisfazione dal fare esercizio fisico*** |  |  |  |  |  |
| ***20 – Penso che l’esercizio fisico sia una perdita di tempo*** |  |  |  |  |  |

*La ringraziamo per la collaborazione*
