# Supplementary material for: Impact on well-being and motivation to physical activity practice by ‘Moving Park’ project in Italy
Source: Springer Nature journal article supplement (doi:10.1007/s11332-025-01447-1), 2025-06-07
Supplement: MOESM2 [file 11332_2025_1447_MOESM2_ESM.docx]

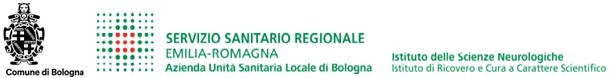


**PARCHI IN MOVIMENTO 2022**

Questionario di rilevazione POST – ATTIVITA’

Gentile partecipante,

le chiediamo di compilare questa scheda che raccoglie alcune informazioni al termine del progetto Parchi in Movimento 2022.

La informiamo che i dati personali forniti saranno utilizzati e trattati esclusivamente dal Comune di Bologna, dall’Azienda USL di Bologna e dall'Università di Bologna nel pieno rispetto della privacy secondo i sensi del decreto legislativo 30 giugno 2003, n. 196 “codice in materia di protezione dei dati personali” e dell’art. 13 del Gdpr (regolamento EU 2016/679). Le risposte fornite verranno elaborate solo in forma aggregata e utilizzate per pubblicazioni scientifiche.

**CODICE:** __________________ (inserisca in stampatello maiuscolo l’iniziale del suo nome seguita

dall’iniziale del suo cognome).

**Data odierna** (formato GG/MM/AAAA) ___________

**Associazione**_______________________________________________________________

**Attività**

**1 - Sesso** 🞎 **M** 🞎 **F** 🞎 **Altro**

**2 - Data di nascita (GG/MM/AAAA)**

**3 – E’ Fumatore/ fumatrice?** 🞎 No 🞎 Sì

**3.1 – Se ha risposto sì, da quando è iniziato Parchi in Movimento, ha mai pensato di smettere di fumare?**

🞎 No 🞎 Sì

**4 - Quanti corsi ha frequentato durante Parchi in Movimento?**

🞎 1 🞎 2 🞎3 🞎 4 🞎 Più di 4

**5 – Per quanto tempo ha frequentato le attività di parchi in movimento?**

🞎 Per una settimana 🞎 Per qualche settimana 🞎 Per un mese intero

🞎 Per più mesi in maniera continuativa (es. maggio-giugno-luglio)

🞎 Per più mesi in maniera discontinua (es. maggio, luglio, settembre)

🞎 Per tutto il periodo di parchi in movimento

**6 – Se Parchi in Movimento continuasse anche nel periodo autunnale/invernale:**

🞎 Continuerei a partecipare all’attività e sarei disposto a versare un contributo

🞎 Continuerei a partecipare se l’attività fosse ancora gratuita

🞎 Non parteciperei

**7 - Quanto è soddisfatto dell’attività proposta e svolta in *Parchi in Movimento*?**

🞎 Per nulla 🞎 Poco 🞎 Abbastanza 🞎 Molto 🞎 Moltissimo

**8 - Ora che Parchi in Movimento è terminato o quasi, quanto pensa che abbia influito sul suo benessere psicofisico la frequenza alle attività?**

🞎 Per nulla 🞎 Poco 🞎 Abbastanza 🞎 Molto 🞎 Moltissimo

**9 - Ora che *Parchi in Movimento* è giunto al termine o quasi, pensa che continuerà a praticare attività fisica con regolarità?**

🞎 No 🞎 Sì

**9.1 – Se no, come mai? (crociare la motivazione principale, una sola risposta)**

🞎 Mancanza di tempo 🞎 Disponibilità economica 🞎 Non ho ancora trovato un’attività che mi interessi

🞎 Mancanza di volontà 🞎 Altro (specificare)

**9.2 Se ha risposto “SI”, per quanto tempo a settimana pensa di svolgere attività fisica moderata (l'attività fisica moderata è quella che permette, durante la sua esecuzione, di parlare ma non di cantare, ad es.: camminare velocemente, ballare, andare in bicicletta ecc.)?**

🞎 Meno di 1h 🞎 1h 🞎 2h 🞎 2,5h 🞎 Più di 2,5h

**9.3 – Se ha risposto “SI”, per quanto tempo a settimana pensa di svolgere attività fisica vigorosa (l’attività fisica vigorosa è quella che non permette, durante la sua esecuzione, né di parlare né di cantare, ad es.: corsa, nuoto, fitness ecc.)?**

🞎 Meno di 30 minuti 🞎 30 minuti 🞎 1h 🞎 1h e 15 🞎 Più di 1h e 15

Siamo interessati a capire le ragioni che la potrebbero aiutare a praticare **attività fisica con regolarità**.

Indicare quanto sono vere per lei le seguenti affermazioni, da 1 (per niente vera) a 5 (molto vera).

| Mi potrebbero aiutare a praticare attività fisica con regolarità | *1*  *(per niente vero)* | *2* | *3* | *4* | *5*  *(molto vero)* |
| --- | --- | --- | --- | --- | --- |
| **10 –** **Il basso costo dell’attività** |  |  |  |  |  |
| **11 –** **La vicinanza da casa** |  |  |  |  |  |
| ***12 –*** ***Il piacere che ne deriva dal praticarla*** |  |  |  |  |  |
| ***13 – Le persone con le quali mi ritrovo per praticarla*** |  |  |  |  |  |
| ***14 – Il raggiungimento dei miei obiettivi personali*** |  |  |  |  |  |

*Ora le faremo qualche domanda sul suo* ***stato di salute e benessere*** *nelle ultime 4 settimane. Scelga la risposta che le sembra più appropriata (barrare una sola risposta)*

| **Nelle ultime 4 settimane,** | *MAI* | *QUASI MAI* | *UNA PARTE DEL TEMPO* | *MOLTO TEMPO* | *QUASI SEMPRE* | *SEMPRE* |
| --- | --- | --- | --- | --- | --- | --- |
| **15 – E’ stato infastidito da stati di tensione o perché aveva i nervi a fior di pelle?** |  |  |  |  |  |  |
| **16 - Quanto si è sentito pieno di energia o vitalità?** |  |  |  |  |  |  |
| **17 - Si è sentito scoraggiato e triste?** |  |  |  |  |  |  |
| **18 - Si è sentito emotivamente stabile e sicuro di sé stesso?** |  |  |  |  |  |  |
| **19 - Si è sentito allegro e sereno?** |  |  |  |  |  |  |
| **20 - Si è sentito stanco, esaurito, logorato o sfinito?** |  |  |  |  |  |  |

*Infine, siamo interessati a capire le ragioni per cui decide di praticare o non praticare esercizio fisico. Indicare quanto sono vere per lei le seguenti affermazioni, da 1 (per niente vero) a 5 (molto vero)*

|  | *1*  *(per niente vero)* | *2* | *3* | *4* | *5*  *(molto vero)* |
| --- | --- | --- | --- | --- | --- |
| **21 – Faccio esercizio fisico perché altre persone dicono che dovrei farlo** |  |  |  |  |  |
| **22 – Mi sento in colpa quando non faccio esercizio fisico** |  |  |  |  |  |
| **23 – È importante per me fare esercizio fisico regolarmente** |  |  |  |  |  |
| **24 – Traggo piacere e soddisfazione dal fare esercizio fisico** |  |  |  |  |  |
| **25 –** **Penso che l’esercizio fisico sia una perdita di tempo** |  |  |  |  |  |

La ringraziamo per la collaborazione
