# Supplementary material for: Impact on well-being and motivation to physical activity practice by ‘Moving Park’ project in Italy
Source: Springer Nature journal article supplement (doi:10.1007/s11332-025-01447-1), 2025-06-07
Supplement: MOESM3 [file 11332_2025_1447_MOESM3_ESM.docx]

| **Table S1.** The differences of wellbeing and motivation in the pre- and post-intervention by age classes | | | | | | | | | | | | | | | | | |
| --- | --- | --- | --- | --- | --- | --- | --- | --- | --- | --- | --- | --- | --- | --- | --- | --- | --- |
| **Females** | **18-44 (n = 35)** | | | | **45-64 (n = 48)** | | | | **≥65 (n = 36)** | | | | **General (n=119)** | | | | |
| **Mean pre ± SD** | **Mean post ± SD** | **Z** | ***p*** | **Mean pre ± SD** | **Mean post ± SD** | **Z** | ***p*** | **Mean pre ± SD** | **Mean post ± SD** | **Z** | ***p*** | **Mean pre ± SD** | **Mean post ± SD** | **Z** | ***p*** |
| **Wellbeing** |  |  |  |  |  |  |  |  |  |  |  |  |  |  |  |  |
| Q10. Have you been bothered by nervousness or your "nerves"? | 1.83 **±** 1.15 | 1.63 **±** 1.09 | 0.82 | 0.414 | 1.79 ± 1.30 | 1.33 ± 1.00 | 2.19 | 0.029* | 0.97 ± 0.86 | 0.89 ± 0.67 | 0.50 | 0.615 | 1.56 ± 1.19 | 1.29 ± 0.98 | 2.11 | 0.035* |
| Q11. How much energy or vitality did you have or feel? | 2.24 **±** 1.02 | 2.37 **±** 0.81 | 0.56 | 0.573 | 2.83 ± 1.15 | 3.06 ± 1.08 | 0.73 | 0.465 | 2.69 ± 0.93 | 2.72 ± 0.85 | 0.38 | 0.705 | 2.61 ± 1.07 | 2.76 ± 0.97 | 1.09 | 0.275 |
| Q12. Did you feel discouraged and sad? | 1.77 **±** 1.14 | 1.54 **±** 0.74 | 1.42 | 0.156 | 1.62 ± 1.07 | 1.21 ± 0.97 | 2.19 | 0.029* | 1.26 ± 0.89 | 0.92 ± 0.73 | 1.93 | 0.053 | 1.56 ± 1.05 | 1.22 ± 0.87 | 3.21 | 0.001* |
| Q13. Did you feel emotionally stable and self-confident? | 2.29 **±** 1.12 | 2.66 **±** 1.06 | 1.76 | 0.078 | 2.85 ± 1.18 | 3.15 ± 1.22 | 1.48 | 0.139 | 2.59 ± 1.18 | 3.03 ± 1.01 | 1.80 | 0.072 | 2.61 ± 1.18 | 2.97 ± 1.12 | 2.85 | 0.004* |
| Q14. Did you feel cheerful and lighthearted? | 2.37 **±** 0.97 | 2.60 **±** 0.85 | 1.66 | 0.096 | 2.55 ± 1.16 | 3.13 ± 1.10 | 2.95 | 0.003* | 2.46 ± 1.09 | 3.03 ± 1.11 | 2.81 | 0.005* | 2.47 ± 1.08 | 2.94 ± 1.05 | 4.37 | 0.000* |
| Q15. Did you feel tired. burnt out. worn out or exhausted? | 1.97 **±** 1.15 | 1.71 **±** 0.89 | 1.14 | 0.256 | 1.81 ± 1.02 | 1.52 ± 0.95 | 1.58 | 0.114 | 1.43 ± 0.70 | 1.14 ± 0.80 | 1.96 | 0.050* | 1.75 ± 1.00 | 1.46 ± 0.91 | 2.64 | 0.008* |
| **Motivation** |  |  |  |  |  |  |  |  |  |  |  |  |  |  |  |  |
| Q16. I exercise because other people say I should. | 1.86 **±** 0.97 | 1.91 **±** 1.15 | 0.00 | 1.000 | 1.51 ± 1.04 | 1.73 ± 1.11 | 1.31 | 0.191 | 1.58 ± 1.03 | 1.58 ± 0.87 | 0.53 | 0.594 | 1.63 ± 1.02 | 1.74 ± 1.05 | 1.32 | 0.188 |
| Q17. I feel guilty when I'm not exercising. | 2.83 **±** 1.12 | 2.94 **±** 0.97 | 0.54 | 0.590 | 2.74 ± 1.44 | 3.02 ± 1.33 | 1.25 | 0.210 | 2.33 ± 1.27 | 2.89 ± 1.35 | 2.00 | 0.046* | 2.65 ± 1.30 | 2.96 ± 1.23 | 2.23 | 0.026* |
| Q18. It's important for me to exercise regularly. | 4.00 **±** 1.26 | 4.17 **±** 0.98 | 1.26 | 0.209 | 4.38 ± 0.91 | 4.54 ± 0.71 | 1.11 | 0.266 | 4.37 ± 0.84 | 4.31 ± 0.79 | 0.61 | 0.541 | 4.26 ± 1.02 | 4.36 ± 0.83 | 1.10 | 0.271 |
| Q19. I get pleasure and satisfaction from exercising. | 4.09 **±** 1.09 | 4.23 **±** 1.03 | 1.24 | 0.214 | 4.52 ± 0.82 | 4.58 ± 0.79 | 0.52 | 0.600 | 4.33 ± 0.89 | 4.06 ± 0.92 | 1.76 | 0.079 | 4.34 ± 0.94 | 4.32 ± 0.93 | 0.14 | 0.888 |
| Q20. I think exercise is a waste of time. | 1.11 **±** 0.40 | 1.17 **±** 0.45 | 0.91 | 0.361 | 1.09 ± 0.46 | 1.15 ± 0.46 | 1.10 | 0.273 | 1.09 ± 0.29 | 1.14 ± 0.35 | 0.73 | 0.463 | 1.09 ± 0.40 | 1.15 ± 0.42 | 1.54 | 0.124 |
| **Males** | **18-44 (n = 4)** | | | | **45-64 (n = 11)** | | | | **≥65 (n = 4)** | | | | **General (n = 19)** | | | | |
| **Wellbeing** |  |  |  | |  |  |  |  |  |  |  |  |  |  |  |  |
| Q10. Have you been bothered by nervousness or your "nerves"? | 1.75 **±** 1.26 | 1.50 **±** 1.91 | - | - | 0.64 ± 0.67 | 0.55 ± 0.52 | 0.40 | 0.686 | 1.25 ± 0.50 | 1.00 ± 0.00 | - | - | 1.00 ± 0.88 | 0.84 ± 0.96 | 0.84 | 0.401 |
| Q11. How much energy or vitality did you have or feel? | 2.25 **±** 0.50 | 2.50 **±** 0.58 | 0.53 | 0.593 | 2.36 ± 1.12 | 3.27 ± 0.90 | 2.03 | 0.043* | 2.50 ± 0.58 | 2.75 ± 0.96 | - | - | 2.37 ± 0.90 | 3.00 ± 0.88 | 2.22 | 0.026* |
| Q12. Did you feel discouraged and sad? | 2.00 **±** 0.00 | 1.25 **±** 0.96 | - | - | 1.00 ± 0.63 | 0.82 ± 0.87 | 0.91 | 0.361 | 1.00 ± 0.00 | 1.25 ± 0.50 | - | - | 1.21 ± 0.63 | 1.00 ± 0.82 | 1.18 | 0.237 |
| Q13. Did you feel emotionally stable and self-confident? | 2.00 **±** 0.82 | 3.25 **±** 1.26 | - | - | 3.36 ± 1.12 | 3.55 ± 0.93 | 0.67 | 0.500 | 3.00 ± 0.82 | 3.50 ± 1.00 | - | - | 3.00 ± 1.11 | 3.47 ± 0.96 | 1.84 | 0.066 |
| Q14. Did you feel cheerful and lighthearted? | 2.25 **±** 0.50 | 2.75 **±** 0.96 | - | - | 2.73 ± 0.90 | 3.36 ± 1.21 | 1.62 | 0.106 | 3.00 ± 0.82 | 3.25 ± 0.96 | 0.53 | 0.593 | 2.68 ± 0.82 | 3.21 ± 1.08 | 1.95 | 0.051 |
| Q15. Did you feel tired. burnt out. worn out or exhausted? | 2.75 **±** 0.96 | 1.50 **±** 1.29 | 1.60 | 0.109 | 1.27 ± 0.65 | 1.27 ± 0.65 | 0.00 | 1.000 | 1.50 ± 0.58 | 1.50 ± 0.58 | - | - | 1.63 ± 0.90 | 1.37 ± 0.76 | 1.24 | 0.214 |
| **Motivation** |  |  |  |  |  |  |  |  |  |  |  |  |  |  |  |  |
| Q16. I exercise because other people say I should. | 2.00 **±** 1.15 | 2.75 **±** 1.71 | - | - | 1.55 ± 0.93 | 1.55 ± 0.93 | 0.00 | 1.000 | 2.50 ± 1.73 | 1.00 ± 0.00 | - | - | 1.84 ± 1.17 | 1.68 ± 1.16 | 0.56 | 0.575 |
| Q17. I feel guilty when I'm not exercising. | 2.25 **±** 1.50 | 2.50 **±** 1.29 | - | - | 2.27 ± 1.10 | 2.82 ± 1.33 | 1.15 | 0.249 | 2.75 ± 1.50 | 3.50 ± 1.91 | 0.109 | 1.60 | 2.37 ± 1.21 | 2.89 ± 1.41 | 1.73 | 0.083 |
| Q18. It's important for me to exercise regularly. | 4.25 **±** 0.96 | 4.25 **±** 0.96 | - | - | 4.45 ± 0.69 | 4.45 ± 0.82 | 0.00 | 1.000 | 4.50 ± 0.58 | 4.75 ± 0.50 | - | - | 4.42 ± 0.69 | 4.47 ± 0.77 | 0.24 | 0.813 |
| Q19. I get pleasure and satisfaction from exercising. | 4.50 **±** 1.00 | 3.50 **±** 1.73 | 0.80 | 0.423 | 4.27 ± 0.65 | 4.55 ± 0.69 | 1.21 | 0.225 | 4.50 ± 0.58 | 4.75 ± 0.50 | - | - | 4.37 ± 0.68 | 4.37 ± 1.01 | 0.53 | 0.594 |
| Q20. I think exercise is a waste of time. | 1.00 **±** 0.00 | 1.00 **±** 0.00 | - | - | 1.00 ± 0.00 | 1.09 ± 0.30 | - | - | 1.00 ± 0.00 | 1.00 ± 0.00 | - | - | 1.00 ± 0.00 | 1.05 ± 0.23 | - | - |
| Note. n, number of observations; SD, standard deviation; t, student’s t-test; p. Z, Z-Score; *p*, p-value; *, statistically significant. | | | | | | | | | | | | | | | | | |

| **Table S2.** The differences of wellbeing and motivation in the pre- and post-intervention by doing regular activities or not | | | | | | | | |
| --- | --- | --- | --- | --- | --- | --- | --- | --- |
| **Females** | **Do physical activities regularly (n = 94)** | | | | **Not do physical activities regularly (n = 25)** | | | |
| **Mean pre ± SD** | **Mean post ± SD** | **Z** | ***p*** | **Mean pre ± SD** | **Mean post ± SD** | **Z** | ***p*** |
| **Wellbeing** |  |  |  |  |  |  |  |  |
| Q10. Have you been bothered by nervousness or your "nerves"? | 1.49 ± 1.18 | 1.19 ± 0.94 | 2.19 | 0.028* | 1.80 ± 1.22 | 1.64 ± 1.04 | 0.41 | 0.683 |
| Q11. How much energy or vitality did you have or feel? | 2.76 ± 1.01 | 2.85 ± 0.98 | 0.62 | 0.538 | 2.08 ± 1.12 | 2.40 ± 0.87 | 1.15 | 0.249 |
| Q12. Did you feel discouraged and sad? | 1.45 ± 0.99 | 1.13 ± 0.87 | 2.69 | 0.007* | 1.96 ± 1.21 | 1.56 ± 0.77 | 1.77 | 0.078 |
| Q13. Did you feel emotionally stable and self-confident? | 2.77 ± 1.19 | 3.06 ± 1.17 | 1.98 | 0.047* | 2.04 ± 0.93 | 2.60 ± 0.87 | 2.67 | 0.008* |
| Q14. Did you feel cheerful and lighthearted? | 2.59 ± 1.09 | 3.09 ± 1.04 | 3.87 | 0.000* | 2.04 ± 0.93 | 2.40 ± 0.91 | 2.10 | 0.036* |
| Q15. Did you feel tired. burnt out. worn out or exhausted? | 1.69 ± 0.94 | 1.41 ± 0.93 | 2.39 | 0.017* | 1.96 ± 1.17 | 1.64 ± 0.81 | 1.10 | 0.272 |
| **Motivation** |  |  |  |  |  |  |  |  |
| Q16. I exercise because other people say I should. | 1.46 ± 0.88 | 1.54 ± 0.86 | 1.08 | 0.280 | 2.28 ± 1.24 | 2.48 ± 1.36 | 0.76 | 0.445 |
| Q17. I feel guilty when I'm not exercising. | 2.63 ± 1.31 | 3.00 ± 1.23 | 2.40 | 0.016* | 2.72 ± 1.31 | 2.80 ± 1.26 | 0.17 | 0.865 |
| Q18. It's important for me to exercise regularly. | 4.52 ± 0.80 | 4.52 ± 0.71 | 0.06 | 0.953 | 3.32 ± 1.18 | 3.76 ± 0.97 | 2.04 | 0.041* |
| Q19. I get pleasure and satisfaction from exercising. | 4.54 ± 0.80 | 4.44 ± 0.87 | 1.12 | 0.264 | 3.56 ± 1.04 | 3.88 ± 1.01 | 1.58 | 0.114 |
| Q20. I think exercise is a waste of time. | 1.08 ± 0.37 | 1.13 ± 0.39 | 1.27 | 0.203 | 1.16 ± 0.47 | 1.24 ± 0.52 | 0.91 | 0.361 |
| **Males** | **Do physical activities regularly (n = 15)** | | | | **Not do physical activities regularly (n = 4)** | | | |
| **Wellbeing** |  |  |  |  |  |  |  |  |
| Q10. Have you been bothered by nervousness or your "nerves"? | 0.93 ± 0.88 | 1.00 ± 1.00 | 0.40 | 0.686 | 1.25 ± 0.96 | 0.25 ± 0.50 | 1.60 | 0.109 |
| Q11. How much energy or vitality did you have or feel? | 2.47 ± 0.99 | 3.13 ± 0.92 | 1.95 | 0.051 | 2.00 ± 0.00 | 2.50 ± 0.58 | - | - |
| Q12. Did you feel discouraged and sad? | 1.07 ± 0.59 | 1.00 ± 0.65 | 0.53 | 0.593 | 1.75 ± 0.50 | 1.00 ± 1.41 | 1.10 | 0.273 |
| Q13. Did you feel emotionally stable and self-confident? | 3.33 ± 0.98 | 3.53 ± 0.92 | 0.94 | 0.345 | 1.75 ± 0.50 | 3.25 ± 1.26 | 1.60 | 0.109 |
| Q14. Did you feel cheerful and lighthearted? | 2.87 ± 0.83 | 3.40 ± 1.06 | 1.68 | 0.093 | 2.00 ± 0.00 | 2.50 ± 1.00 | - | - |
| Q15. Did you feel tired. burnt out. worn out or exhausted? | 1.47 ± 0.92 | 1.40 ± 0.63 | 0.40 | 0.686 | 2.25 ± 0.50 | 1.25 ± 1.26 | 1.28 | 0.201 |
| **Motivation** |  |  |  |  |  |  |  |  |
| Q16. I exercise because other people say I should. | 1.67 ± 1.11 | 1.27 ± 0.59 | 1.15 | 0.249 | 2.50 ± 1.29 | 3.25 ± 1.50 | - | - |
| Q17. I feel guilty when I'm not exercising. | 2.47 ± 1.19 | 3.00 ± 1.46 | 1.43 | 0.154 | 2.00 ± 1.41 | 2.50 ± 1.29 | - | - |
| Q18. It's important for me to exercise regularly. | 4.53 ± 0.52 | 4.67 ± 0.62 | 0.73 | 0.463 | 4.00 ± 1.15 | 3.75 ± 0.96 | 0.27 | 0.789 |
| Q19. I get pleasure and satisfaction from exercising. | 4.53 ± 0.52 | 4.67 ± 0.62 | 0.73 | 0.463 | 3.75 ± 0.96 | 3.25 ± 1.50 | 0.00 | 1.000 |
| Q20. I think exercise is a waste of time. | 1.00 ± 0.00 | 1.07 ± 0.26 | - | - | 1.00 ± 0.00 | 1.00 ± 0.00 | - | - |
| Note. n, number of observations; SD, standard deviation; t, student’s t-test; p. Z, Z-Score; p, p-value; *, statistically significant. | | | | | | | | |

| **Table S3.** The differences of wellbeing and motivation in the pre- and post-intervention by different length of time doing moderate PA | | | | | | | | | | | | |
| --- | --- | --- | --- | --- | --- | --- | --- | --- | --- | --- | --- | --- |
| **Females** | **<1h, 1h (n = 9)** | | | | **2h, 2.5h (n = 39)** | | | | **> 2.5h (n = 43)** | | | |
| **Mean pre ± SD** | **Mean post ± SD** | **Z** | **p** | **Mean pre ± SD** | **Mean post ± SD** | **Z** | ***p*** | **Mean pre ± SD** | **Mean post ± SD** | **Z** | ***p*** |
| **Wellbeing** |  |  |  |  |  |  |  |  |  |  |  |  |
| Q10. Have you been bothered by nervousness or your "nerves"? | 0.78 ± 0.83 | 0.89 ± 0.60 | 0.31 | 0.753 | 1.27 ± 0.99 | 1.15 ± 0.87 | 0.71 | 0.478 | 1.86 ± 1.30 | 1.26 ± 1.03 | 2.80 | 0.005* |
| Q11. How much energy or vitality did you have or feel? | 2.50 ± 0.93 | 3.00 ± 0.87 | 1.48 | 0.138 | 2.73 ± 0.99 | 2.74 ± 0.94 | 0.00 | 1.000 | 2.79 ± 1.08 | 2.95 ± 1.07 | 0.63 | 0.530 |
| Q12. Did you feel discouraged and sad? | 1.44 ± 0.73 | 0.78 ± 0.67 | 1.68 | 0.093 | 1.30 ± 0.97 | 1.13 ± 0.73 | 1.16 | 0.247 | 1.63 ± 1.02 | 1.16 ± 0.97 | 2.60 | 0.009* |
| Q13. Did you feel emotionally stable and self-confident? | 2.50 ± 1.07 | 3.22 ± 0.97 | 1.36 | 0.173 | 2.78 ± 1.20 | 3.18 ± 1.11 | 1.48 | 0.140 | 2.76 ± 1.21 | 2.93 ± 1.24 | 0.76 | 0.449 |
| Q14. Did you feel cheerful and lighthearted? | 2.67 ± 1.32 | 3.33 ± 0.87 | 1.26 | 0.208 | 2.54 ± 1.02 | 3.15 ± 0.96 | 3.08 | 0.002* | 2.60 ± 1.14 | 2.98 ± 1.12 | 2.07 | 0.038* |
| Q15. Did you feel tired. burnt out. worn out or exhausted? | 1.67 ± 0.71 | 1.22 ± 0.83 | 1.47 | 0.142 | 1.68 ± 0.96 | 1.41 ± 0.88 | 1.87 | 0.061 | 1.72 ± 0.96 | 1.42 ± 0.96 | 1.49 | 0.135 |
| **Motivation** |  |  |  |  |  |  |  |  |  |  |  |  |
| Q16. I exercise because other people say I should. | 1.44 ± 0.73 | 1.33 ± 0.50 | - | - | 1.36 ± 0.72 | 1.59 ± 0.94 | 1.68 | 0.093 | 1.55 ± 1.04 | 1.58 ± 0.88 | 0.34 | 0.737 |
| Q17. I feel guilty when I'm not exercising. | 2.33 ± 1.50 | 2.56 ± 0.88 | 0.73 | 0.463 | 2.71 ± 1.27 | 2.95 ± 1.15 | 0.76 | 0.449 | 2.62 ± 1.32 | 3.21 ± 1.34 | 2.75 | 0.006* |
| Q18. It's important for me to exercise regularly. | 3.89 ± 1.17 | 3.89 ± 0.93 | 0.00 | 1.000 | 4.29 ± 0.93 | 4.56 ± 0.72 | 1.59 | 0.112 | 4.84 ± 0.37 | 4.65 ± 0.57 | 1.77 | 0.078 |
| Q19. I get pleasure and satisfaction from exercising. | 3.78 ± 1.09 | 3.56 ± 1.13 | 0.80 | 0.423 | 4.44 ± 0.88 | 4.51 ± 0.76 | 0.56 | 0.576 | 4.81 ± 0.45 | 4.60 ± 0.79 | 1.72 | 0.086 |
| Q20. I think exercise is a waste of time. | 1.22 ± 0.44 | 1.22 ± 0.44 | - | - | 1.05 ± 0.23 | 1.08 ± 0.27 | 0.53 | 0.593 | 1.07 ± 0.46 | 1.16 ± 0.48 | 1.35 | 0.178 |
| **Males** | **<1h, 1h (n = 3)** | | | | **2h, 2.5h (n = 6)** | | | | **> 2.5h (n = 6)** | | | |
| **Wellbeing** |  |  |  |  |  |  |  |  |  |  |  |  |
| Q10. Have you been bothered by nervousness or your "nerves"? | 0.67 ± 0.58 | 0.67 ± 0.58 | - | - | 1.33 ± 1.03 | 1.50 ± 1.22 | 0.53 | 0.593 | 0.67 ± 0.82 | 0.67 ± 0.82 | - | - |
| Q11. How much energy or vitality did you have or feel? | 3.00 ± 1.00 | 3.33 ± 0.58 | - | - | 1.67 ± 0.52 | 2.67 ± 1.03 | 1.60 | 0.109 | 3.00 ± 0.89 | 3.50 ± 0.84 | 0.94 | 0.345 |
| Q12. Did you feel discouraged and sad? | 1.00 ± 0.00 | 1.00 ± 0.00 | - | - | 1.33 ± 0.52 | 1.33 ± 0.52 | - | - | 0.83 ± 0.75 | 0.67 ± 0.82 | - | - |
| Q13. Did you feel emotionally stable and self-confident? | 3.67 ± 0.58 | 3.67 ± 0.58 | - | - | 2.67 ± 0.82 | 3.17 ± 0.98 | - | - | 3.83 ± 0.98 | 3.83 ± 0.98 | - | - |
| Q14. Did you feel cheerful and lighthearted? | 3.33 ± 0.58 | 3.33 ± 1.15 | - | - | 2.50 ± 0.84 | 3.00 ± 0.89 | 1.07 | 0.285 | 3.00 ± 0.89 | 3.83 ± 1.17 | 1.60 | 0.109 |
| Q15. Did you feel tired. burnt out. worn out or exhausted? | 1.00 ± 0.00 | 1.00 ± 0.00 | - | - | 2.00 ± 1.10 | 1.67 ± 0.82 | - | - | 1.17 ± 0.75 | 1.33 ± 0.52 | 0.53 | 0.593 |
| **Motivation** |  |  |  |  |  |  |  |  |  |  |  |  |
| Q16. I exercise because other people say I should. | 1.33 ± 0.58 | 1.33 ± 0.58 | - | - | 1.50 ± 1.22 | 1.17 ± 0.41 | - | - | 2.00 ± 1.26 | 1.33 ± 0.82 | - | - |
| Q17. I feel guilty when I'm not exercising. | 2.00 ± 0.00 | 2.00 ± 1.00 | - | - | 2.33 ± 1.51 | 3.50 ± 1.38 | 1.60 | 0.109 | 2.83 ± 1.17 | 3.00 ± 1.67 | 0.40 | 0.686 |
| Q18. It's important for me to exercise regularly. | 4.67 ± 0.58 | 5.00 ± 0.00 | - | - | 4.17 ± 0.41 | 4.50 ± 0.84 | 0.91 | 0.361 | 4.83 ± 0.41 | 4.67 ± 0.52 | - | - |
| Q19. I get pleasure and satisfaction from exercising. | 4.67 ± 0.58 | 5.00 ± 0.00 | - | - | 4.17 ± 0.41 | 4.50 ± 0.84 | 0.91 | 0.361 | 4.83 ± 0.41 | 4.67 ± 0.52 | - | - |
| Q20. I think exercise is a waste of time. | 1.00 ± 0.00 | 1.00 ± 0.00 | - | - | 1.00 ± 0.00 | 1.17 ± 0.41 | - | - | 1.00 ± 0.00 | 1.00 ± 0.00 | - | - |
| Note. n, number of observations; SD, standard deviation; t, student’s t-test; p. Z, Z-Score; p, p-value; *, statistically significant; PA, physical activities. | | | | | | | | | | | | |

| **Table S4.** The differences of wellbeing and motivation in the pre- and post-intervention by different length of time doing vigorous PA | | | | | | | | | | |
| --- | --- | --- | --- | --- | --- | --- | --- | --- | --- | --- |
| **Females** | | | **<30min, 30min, 1h, 1.25h (n = 65)** | | | | **>1.25h (n = 25)** | | | |
| **Mean pre ± SD** | **Mean post ± SD** | **Z** | ***p*** | **Mean pre ± SD** | **Mean post ± SD** | **Z** | ***p*** |
| **Wellbeing** | | |  |  |  |  |  |  |  |  |
| Q10. Have you been bothered by nervousness or your "nerves"? | | | 1.45 ± 1.08 | 1.14 ± 0.86 | 1.96 | 0.050* | 1.68 ± 1.41 | 1.40 ± 1.15 | 1.07 | 0.286 |
| Q11. How much energy or vitality did you have or feel? | | | 2.65 ± 0.95 | 2.89 ± 1.00 | 1.81 | 0.071 | 2.92 ± 1.15 | 2.80 ± 1.00 | 1.12 | 0.263 |
| Q12. Did you feel discouraged and sad? | | | 1.50 ± 0.87 | 1.11 ± 0.81 | 3.04 | 0.002* | 1.40 ± 1.26 | 1.28 ± 1.02 | 0.03 | 0.972 |
| Q13. Did you feel emotionally stable and self-confident? | | | 2.65 ± 1.12 | 3.02 ± 1.12 | 2.15 | 0.032* | 3.00 ± 1.32 | 3.12 ± 1.30 | 0.16 | 0.875 |
| Q14. Did you feel cheerful and lighthearted? | | | 2.50 ± 0.99 | 3.06 ± 1.01 | 3.55 | 0.000* | 2.72 ± 1.28 | 3.16 ± 1.11 | 1.61 | 0.108 |
| Q15. Did you feel tired. burnt out. worn out or exhausted? | | | 1.65 ± 0.86 | 1.43 ± 0.98 | 1.87 | 0.061 | 1.88 ± 1.13 | 1.44 ± 0.82 | 1.56 | 0.118 |
| **Motivation** | | |  |  |  |  |  |  |  |  |
| Q16. I exercise because other people say I should. | | | 1.46 ± 0.78 | 1.62 ± 0.93 | 1.34 | 0.179 | 1.50 ± 1.14 | 1.44 ± 0.71 | 0.05 | 0.959 |
| Q17. I feel guilty when I'm not exercising. | | | 2.73 ± 1.33 | 3.05 ± 1.20 | 1.65 | 0.099 | 2.50 ± 1.22 | 3.00 ± 1.19 | 1.86 | 0.063 |
| Q18. It's important for me to exercise regularly. | | | 4.36 ± 0.88 | 4.46 ± 0.73 | 0.74 | 0.459 | 4.92 ± 0.28 | 4.72 ± 0.61 | 1.48 | 0.138 |
| Q19. I get pleasure and satisfaction from exercising. | | | 4.40 ± 0.88 | 4.38 ± 0.93 | 0.04 | 0.968 | 4.88 ± 0.44 | 4.64 ± 0.70 | 2.02 | 0.043* |
| Q20. I think exercise is a waste of time. | | | 1.11 ± 0.44 | 1.15 ± 0.40 | 0.89 | 0.374 | 1.00 ± 0.00 | 1.08 ± 0.40 | - | - |
| **Males** |  |  | **<30min, 30min, 1h, 1.25h (n = 9)** | | | | **>1.25h (n = 5)** | | | |
| **Wellbeing** | | |  |  |  |  |  |  |  |  |
| Q10. Have you been bothered by nervousness or your "nerves"? | | | 0.78 ± 0.67 | 0.78 ± 0.44 | 0.00 | 1.000 | 1.20 ± 1.30 | 1.40 ± 1.67 | - | - |
| Q11. How much energy or vitality did you have or feel? | | | 2.56 ± 1.01 | 3.00 ± 0.87 | 1.35 | 0.178 | 2.60 ± 0.89 | 3.20 ± 1.10 | 1.07 | 0.285 |
| Q12. Did you feel discouraged and sad? | | | 0.89 ± 0.33 | 1.00 ± 0.50 | - | - | 1.20 ± 0.84 | 1.00 ± 1.00 | - | - |
| Q13. Did you feel emotionally stable and self-confident? | | | 3.33 ± 0.87 | 3.44 ± 0.88 | 0.53 | 0.593 | 3.60 ± 1.14 | 3.60 ± 1.14 | - | - |
| Q14. Did you feel cheerful and lighthearted? | | | 3.00 ± 0.87 | 3.33 ± 1.12 | 0.94 | 0.345 | 2.80 ± 0.84 | 3.40 ± 1.14 | - | - |
| Q15. Did you feel tired. burnt out. worn out or exhausted? | | | 1.22 ± 0.44 | 1.33 ± 0.50 | - | - | 1.80 ± 1.48 | 1.60 ± 0.89 | 0.53 | 0.593 |
| **Motivation** | | |  |  |  |  |  |  |  |  |
| Q16. I exercise because other people say I should. | | | 1.89 ± 1.27 | 1.22 ± 0.44 | 1.15 | 0.249 | 1.40 ± 0.89 | 1.40 ± 0.89 | - | - |
| Q17. I feel guilty when I'm not exercising. | | | 2.33 ± 1.12 | 2.78 ± 1.64 | 0.94 | 0.345 | 3.00 ± 1.22 | 3.20 ± 1.30 | 0.53 | 0.593 |
| Q18. It's important for me to exercise regularly. | | | 4.44 ± 0.53 | 4.67 ± 0.71 | 0.91 | 0.361 | 4.80 ± 0.45 | 4.60 ± 0.55 | - | - |
| Q19. I get pleasure and satisfaction from exercising. | | | 4.44 ± 0.53 | 4.67 ± 0.71 | 0.91 | 0.361 | 4.80 ± 0.45 | 4.60 ± 0.55 | - | - |
| Q20. I think exercise is a waste of time. | | | 1.00 ± 0.00 | 1.00 ± 0.00 | - | - | 1.00 ± 0.00 | 1.00 ± 0.00 | - | - |
| Note. n, number of observations; SD, standard deviation; t, student’s t-test; p. Z, Z-Score; p, p-value; *, statistically significant; PA, physical activities. | | | | | | | | | | |
